# Supplementary material
Source: publisher site journal article supplement (https://www.dovepress.com/article/571357)
Supplement: Supplementary file 1 [file 571357_Supplemental%20Material%20%25282%2529.docx]

**Supplemental Material**


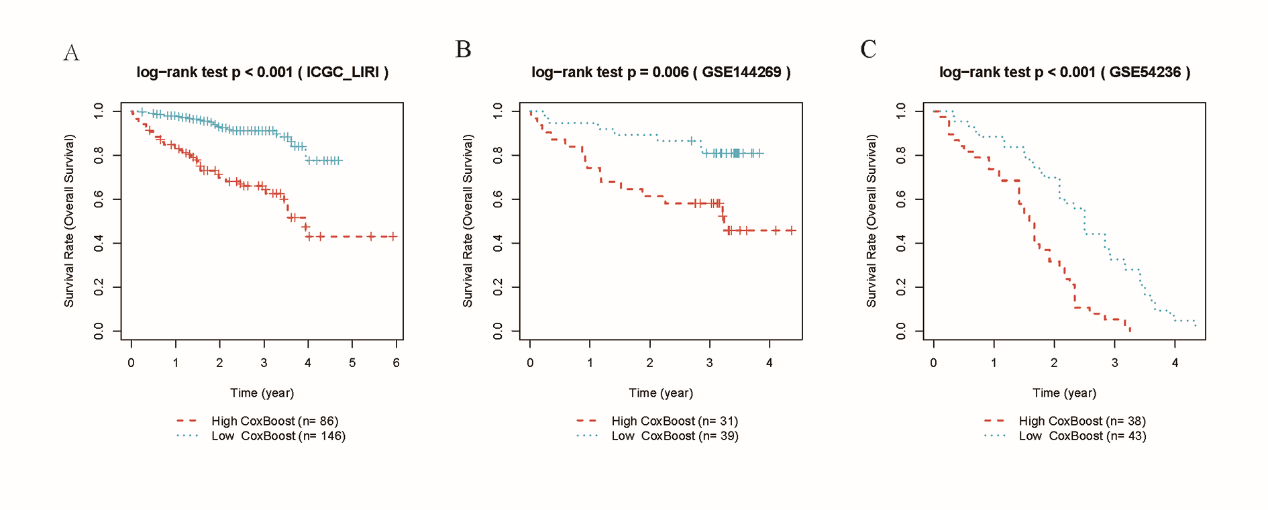


**Figure S1 Overall survival cohort of multiple datasets in the CoxBoost model**
**Figure S1 A-C** In the three cohorts of ICGC_LIRI, GSE144269, and GSE54236, the prognosis of the high-risk group was significantly poorer, while that of the low-risk group was relatively favorable, with log-rank test *p*-values of < 0.001, = 0.006, and < 0.001, respectively.


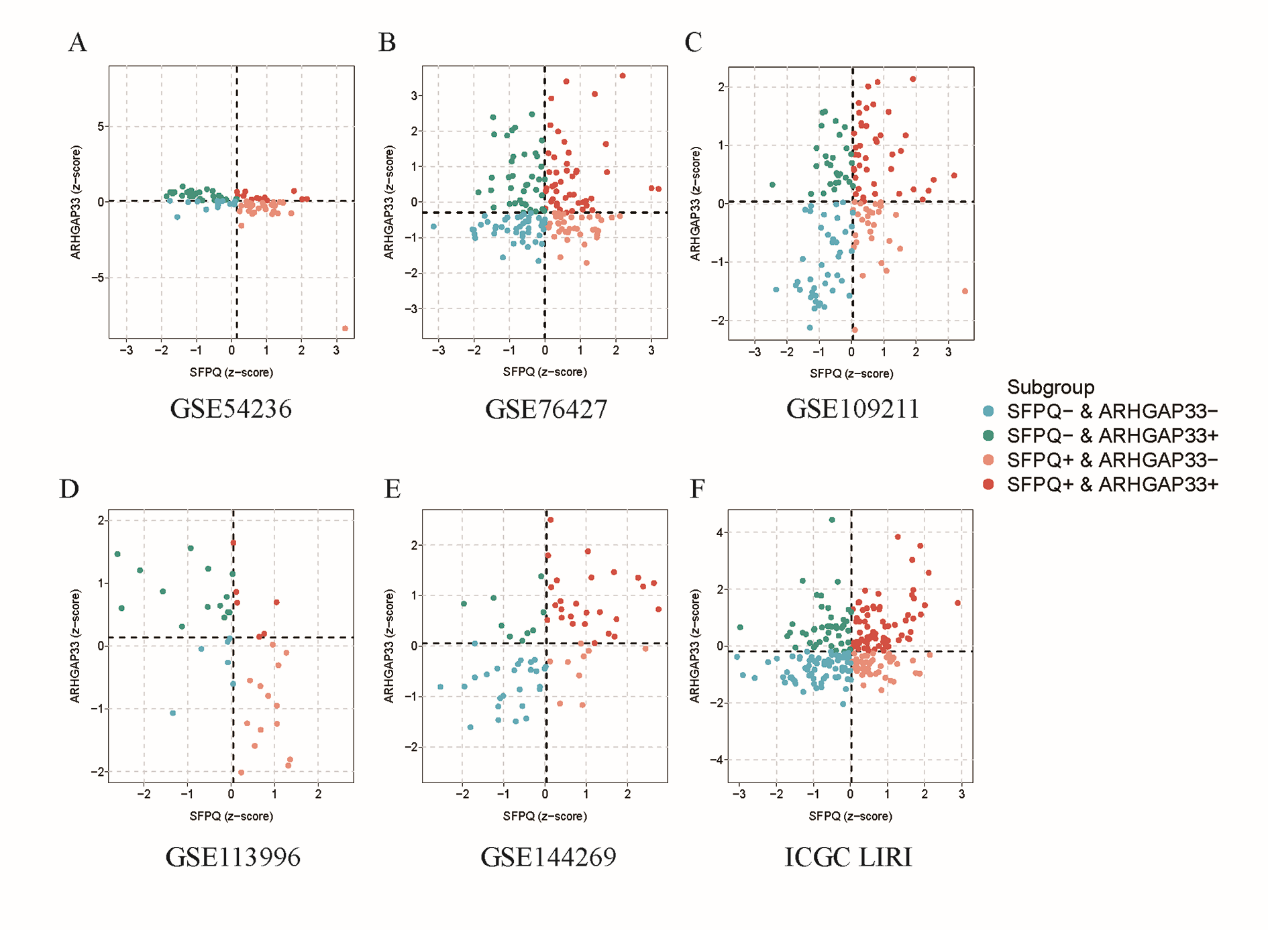


**Figure S2 Expression characteristics of ARHGAP33 and SFPQ genes across multiple datasets**
**Figure S2 A-F** ARHGAP33 exhibits co-expression with SFPQ in the majority of cohorts.
